# Supplementary material for: Weight-Based, Insulin Dose–Related Hypoglycemia in Hospitalized Patients With Diabetes
Source: PubMed Central journal article supplement — Diabetes Care. 2011 Jul 16;34(8):1723–8. doi: 10.2337/dc10-2434 (PMC3142056; doi:10.2337/dc10-2434), 2011-07-16
Supplement: supp_dc10-2434v102434_DC102434SupplementaryData.pdf [file supp_dc10-2434v102434_DC102434SupplementaryData.pdf]

SUPPLEMENTARY DATA

**Supplementary Table 1. Sample characteristics of matched factors by case status**

|                              | All patients (n,%) | Cases, % | Controls, % |
|------------------------------|--------------------|----------|-------------|
|                              | N = 1990           | n = 995  | n = 995     |
| <b>Age, years</b>            |                    |          |             |
| 18 – 30                      | 52, 2.6%           | 2.6%     | 2.6%        |
| 31 – 64                      | 956, 48.0%         | 48.0%    | 48.0%       |
| 65 – 80                      | 760, 38.2%         | 38.2%    | 38.2%       |
| 81                           | 222, 11.2%         | 11.2%    | 11.2%       |
| <b>Males</b>                 | 954, 47.9%         | 47.9%    | 47.9%       |
| <b>BMI, kg/m<sup>2</sup></b> |                    |          |             |
| < 18.5                       | 50, 2.5%           | 2.5%     | 2.5%        |
| 18.5 – 25                    | 518, 26.1%         | 26.0%    | 26.0%       |
| 25 – 30                      | 532, 26.7%         | 26.7%    | 26.7%       |
| > 30                         | 890, 44.7%         | 44.7%    | 44.7%       |
